# Supplementary material for: Adipocytokines in Untreated Newly Diagnosed Rheumatoid Arthritis: Association with Circulating Chemokines and Markers of Inflammation
Source: MDPI journal article supplement (doi:10.3390/biom11020325), 2021-02-21
Supplement: s1 [file s1]

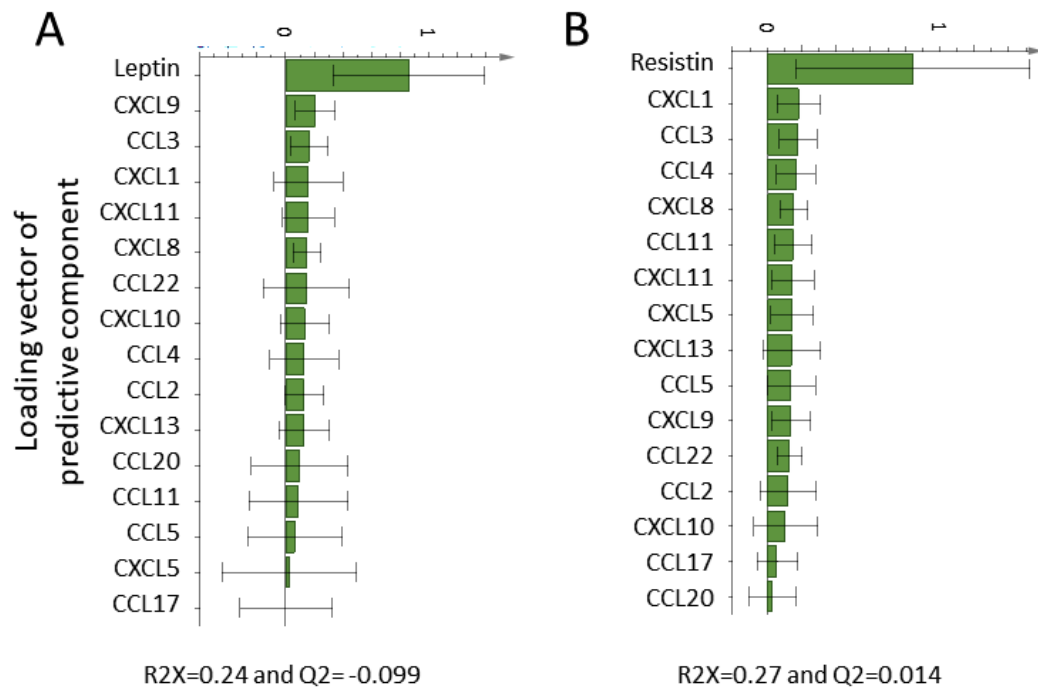

**Supplementary Figure 1. OPLS loadings column plot of the association of leptin and resistin with plasma chemokines.** OPLS models depicting the association of leptin (A) and resistin (B) with plasma chemokines. X-variables represented by a bar pointing in the same direction as the y-variable (adipocytokine) were associated with higher leptin or resistin levels, whereas x-variables represented by a bar pointing in the opposite direction were related to lower leptin or resistin. Only variables associated with plasma leptin/resistin in the OPLS analysis were tested for significance with linear regression analyses. *Abbreviation:* OPLS, orthogonal projection to latent structures.



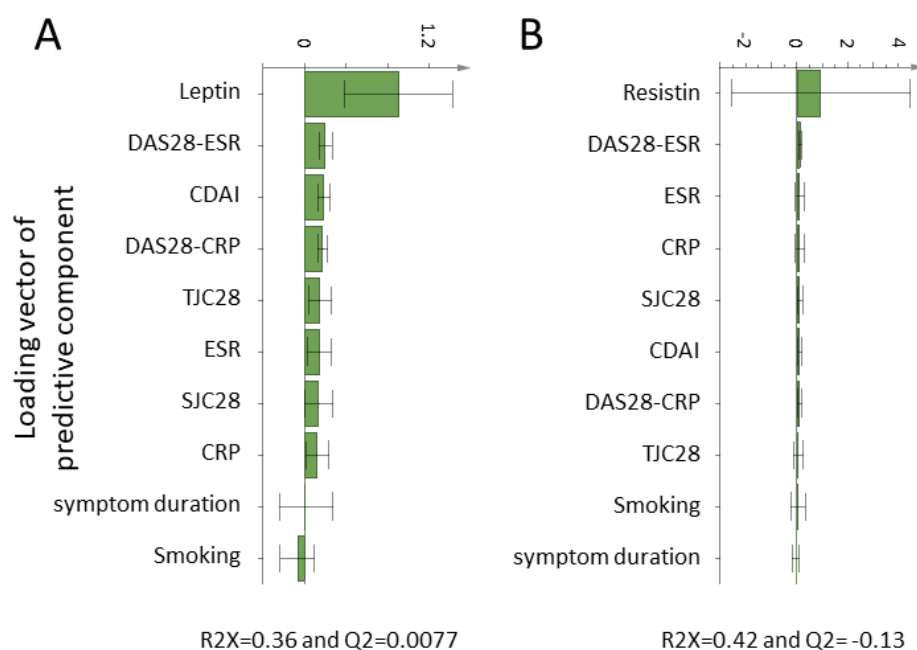

**Supplementary Figure 2. OPLS loadings column plot of the association of leptin and resistin with clinical markers of disease activity.** OPLS models depicting the association of leptin (A) and resistin (B) with clinical markers of disease activity. X-variables represented by a bar pointing in the same direction as the y-variable (adipocytokine) were associated with higher leptin or resistin levels, whereas x-variables represented by a bar pointing in the opposite direction were related to lower leptin or resistin. Only variables associated with plasma leptin/resistin in the OPLS analysis were tested for significance with linear regression analyses. *Abbreviations:* CDAI, clinical disease activity index; CRP, C-reactive protein; DAS28, disease activity score in 28 joints; ESR, erythrocyte sedimentation rate; OPLS, orthogonal projection to latent structures; SJC28, swollen joint counts of 28; TJC28, tender joint counts of 28.
