# Supplementary material for: Adipocytokines in Untreated Newly Diagnosed Rheumatoid Arthritis: Association with Circulating Chemokines and Markers of Inflammation
Source: MDPI journal article supplement (doi:10.3390/biom11020325), 2021-02-21
Supplement: s1 [file s1]

**Table S1.** Linear regression analysis of leptin with plasma chemokines and clinical parameters.

| Characteristic        | Leptin  |              |
|-----------------------|---------|--------------|
|                       | p-value | $\beta$ coef |
| CXCL9/MIG*            | 0.512   | 0.130        |
| CCL3/MIP-1 $\alpha$ * | 0.351   | 0.186        |
| CXCL1/GRO $\alpha$ *  | 0.192   | 0.256        |
| CXCL11/I-TAC          | 0.838   | 0.038        |
| DAS28-ESR             | 0.588   | 0.098        |
| CDAI                  | 0.406   | 0.151        |
| DAS28-CRP             | 0.414   | 0.149        |
| TJC28                 | 0.341   | 0.175        |

Multiple linear regression adjusted for sex, age and BMI. Only variables associated with plasma leptin in the OPLS analysis were tested for significance with linear regression analyses.

*Abbreviations:* DAS28, disease activity score in 28 joints; ESR, erythrocyte sedimentation rate; CDAI, Clinical Disease Activity Index; CRP, C-reactive protein; TJC28 tender joint counts of 28.

\* CCL3/MIP-1 $\alpha$  was undetectable in 15% of samples, CXCL9/MIG in 14%, CXCL1/GRO $\alpha$  in 17% and CCL4/MIP-1 $\beta$  in 11%.

**Table S2.** Linear regression analysis of resistin with plasma chemokines

| Characteristic        | Resistin |              |
|-----------------------|----------|--------------|
|                       | p-value  | $\beta$ coef |
| CXCL1/GRO $\alpha$ *  | 0.859    | 0.025        |
| CCL3/MIP-1 $\alpha$ * | 0.576    | 0.078        |
| CCL4/MIP-1 $\beta$ *  | 0.462    | 0.103        |
| CXCL8/IL-8            | 0.157    | 0.196        |

Multiple linear regression adjusted for sex, age and BMI. Only variables associated with plasma resistin in the OPLS analysis were tested for significance with linear regression analyses.

\* CXCL1/GRO $\alpha$  was undetectable in 17% of samples, CCL3/MIP-1 $\alpha$  in 15% and CCL4/MIP-1 $\beta$  in 11%.
